# Supplementary material
Source: MDPI journal article supplement (https://www.mdpi.com/2035-8377/16/1/4)
Supplement: s1 [file s1]

*Supplementary Table S1. Comparison between the different neuropsychological assessments (pre-surgical intervention, post-edema, follow-up) in patient 1*

|                                         | Pre-STN-DBS | Post-STN-DBS |         |          |           |
|-----------------------------------------|-------------|--------------|---------|----------|-----------|
| Test                                    | 6 months    | 1 week       | 3 weeks | 2 months | 10 months |
| <b>Screening</b>                        |             |              |         |          |           |
| Mini-Mental State Examination (/30)     | 30          | 20*          | 27      | /        | 29        |
| <b>Attention and Working Memory</b>     |             |              |         |          |           |
| Visual Attention Test (/50)             | 48          | 26           | 42      | /        | 39        |
| Trial Making Test                       |             |              |         |          |           |
| - Test A sec.                           | 44          | n.a.         | /       | /        | 34        |
| - Test B sec.                           | 95          | n.a.         | /       | /        | 202       |
| - B-A sec.                              | 51          | n.a.         | /       | /        | 168       |
| <b>Short-term Memory</b>                |             |              |         |          |           |
| Digit Span Forward                      | 5           | 5            | 5       | 5        | 7         |
| Digit Span Backward                     | 4           | 2*           | 3       | 3        | 4         |
| Corsi Block Span Forward                | 5           | 3*           | 4       | 4        | 4         |
| Corsi Block Span Backward               | 4           | 2*           | 4       | 4        | 4         |
| <b>Verbal Long-term Memory</b>          |             |              |         |          |           |
| Babcock (/28)                           | 14,5        | 10,5         | /       | 15,5     | 21,5      |
| Associate learning (/22,5)              | 9           | /            | /       | /        | 15        |
| FCSRT (/12)                             | 12          | 9            | /       | /        | /         |
| <b>Visuo-Spatial Long-term Memory</b>   |             |              |         |          |           |
| Rey Figure – differed recall (/36)      | 15,5        | 11           | 10      | /        | 13,5      |
| Visuo-spatial Supraspan                 |             |              |         |          |           |
| - Immediate recall (/29,16)             | 7,1         | /            | /       | /        | n.a.      |
| - Differed recall (/1,62)               | 0,53        | /            | /       | /        | n.a.      |
| <b>Visuo-spatial Functions</b>          |             |              |         |          |           |
| Rey Figure - copy (/36)                 | 35          | 22           | 35      | /        | 32        |
| Judgment of Line Orientation Test (/30) | 15          | n.a.         | /       | 16       | 19        |
| Clock DrawingTest (/10)                 | /           | 0*           | 1*      | 10       |           |
| VOSP                                    |             |              |         |          |           |
| - Pre-test (/20)                        | 19          | /            | /       | /        | 19        |
| - Incomplete Letters(20)                | 20          | /            | /       | /        | 19        |
| - Silhouettes (30)                      | 24          | /            | /       | /        | 23        |
| - Object Decision (/20)                 | 17          | /            | /       | /        | 18        |
| - Progressive Silhouette (/20)          | 8*          | /            | /       | /        | 11*       |
| - Dot counting (/10)                    | 10          | /            | /       | /        | 10        |
| - Position Discrimination (/20)         | 20          | /            | /       | /        | 19        |
| - Number Location (/10)                 | 6*          | /            | /       | /        | 6*        |
| - Cube Analysis (/10)                   | 9           | /            | /       | /        | 9         |
| <b>Language</b>                         |             |              |         |          |           |
| Phonemic Fluency                        | 49          | 20           | 33      | /        | 49        |
| Semantic Fluency                        | 48          | 26*          | 39      | /        | 46        |
| WAIS IV - Similarity (/36)              | 26          | 17           | /       | /        | 15        |
| Visual Naming                           |             |              |         |          |           |

|                                                     |      |      |    |     |      |
|-----------------------------------------------------|------|------|----|-----|------|
| - Not Livings (/32)                                 | 32   | 30   | /  | /   | 32   |
| - Livings (/32)                                     | 32   | 30   | /  | /   | 27   |
| <b>Executive functions</b>                          |      |      |    |     |      |
| Raven CPM 47 (/36)                                  | 33   | 15*  | /  | /   | 29   |
| FAB (/18)                                           | 18   | 8*   | 16 |     | 18   |
| <b>Stroop</b>                                       |      |      |    |     |      |
| - Time interference sec.                            | 20,5 | n.a. | /  | 28  | 19,5 |
| - Error interference (/30)                          | 0    | n.a. | /  | 0   | 0    |
| <b>Time And Weight Estimation Task (STEP)</b>       |      |      |    |     |      |
| - Time total (/30)                                  | 21   | 21   | /  | 20  | 25   |
| - Weight total (/30)                                | 21   | 11*  | /  | 13* | 24   |
| - Time + Weight total (/60)                         | 42   | 32*  | /  | 33* | 49   |
| - Time – Weight total (/60)                         | 0    | 10*  | /  | 7   | 1    |
| <b>Modified Wisconsin Card Sorting Test - MCST</b>  |      |      |    |     |      |
| - Categories (/6)                                   | 6    | /    | /  | /   | 6    |
| - Errors (/47)                                      | 7    | /    | /  | /   | 2    |
| - Perseverative Errors (/47)                        | 4    | /    | /  | /   | 1    |
| <b>Mental health screening</b>                      |      |      |    |     |      |
| <b>Hospital Anxiety and Depression Scale - HADS</b> |      |      |    |     |      |
| - Anxiety (/21)                                     | 6    | /    | /  | /   | 7    |
| - Depression (/21)                                  | 6    | /    | /  | /   | 8    |
| <b>Activities of Daily Living</b>                   |      |      |    |     |      |
| - ADL (/6)                                          | 6    | /    | 6  | /   | 6    |
| - IADL (/8)                                         | 8    | /    | 7  | /   | 8    |

**Abbreviations:** Activities of daily living (ADL); Instrumental activities of daily living (IADL); frontal assessment battery (FAB).

*Supplementary Table S2. Unilateral spatial hemineglect assessment in patient 1*

| Test                            | post edema STN-DBS | 3 weeks later |
|---------------------------------|--------------------|---------------|
| <b>Apples Cancellation Task</b> |                    |               |
| Left Omissions (/20)            | 14                 | 0             |
| Right Omissions (/20)           | 0                  | 0             |
| Accuracy (total Omissions)      | 15*                | 0             |
| Egocentric Asymmetry (/20)      | 14*                | 0             |
| Total False positives           | 3                  | 0             |
| Allocentric Asymmetry (/20)     | 1                  | 0             |
| Total time (sec.)               | 250                | 100           |

*Supplementary Table S3. Comparison between the different neuropsychological assessments (pre-surgical intervention, post-edema, follow-up) in patient 2*

| Pre-STN-DBS                             |          | Post-STN-DBS |         |          |          |
|-----------------------------------------|----------|--------------|---------|----------|----------|
| Test                                    | 6 months | 1 week       | 6 weeks | 4 months | 7 months |
| <b>Screening</b>                        |          |              |         |          |          |
| Mini-Mental State Examination (/30)     | 29       | 25           | 30      | /        | 29       |
| <b>Attention and Working Memory</b>     |          |              |         |          |          |
| Visual attention Test (/50)             | 45       | 9*           | 41      | /        | 41       |
| Trial Making Test                       |          |              |         |          |          |
| - Test A sec.                           | 38       | n.a.         | 69      | 43       | 40       |
| - Test B sec.                           | 75       | n.a.         | 167     | 150      | 129      |
| - B-A sec.                              | 37       | n.a.         | 98      | 107      | 89       |
| <b>Short-term memory</b>                |          |              |         |          |          |
| Digit Span Forward                      | 6        | /            | 6       | /        | 6        |
| Digit Span Backward                     | 4        | /            | 4       | /        | 4        |
| Corsi Block Span Forward                | 5        | 3*           | 4       | /        | 5        |
| Corsi Block Span Backward               | 6        | 2*           | 4       | /        | 4        |
| <b>Verbal long-term memory</b>          |          |              |         |          |          |
| Babcock (/28)                           | 18,5     | /            | 16      | /        | 20,5     |
| Associate learning (/22,5)              | 13,5     | /            | /       | /        | 10       |
| FCSRT-16-free                           |          |              |         |          |          |
| - Tot. Immediate Free Recall (/48)      | 32       | /            | /       | /        | 33       |
| - Riev. Differed Free Recall (/16)      | 13       | /            | /       | /        | 10       |
| <b>Visuo-spatial long-term Memory</b>   |          |              |         |          |          |
| Rey – differed recall (/36)             | 19,5     | 9*           | 12      | 19       | 16,5     |
| Visuo-spatial Supraspan                 |          |              |         |          |          |
| - Immediate recall (/29,16)             | 11,18*   | /            | /       | /        | 8,84*    |
| - Differed recall (/1,62)               | 1,4      | /            | /       | /        | 0*       |
| <b>Visuo-spatial Functions</b>          |          |              |         |          |          |
| Rey Figure – Copy (/36)                 | 34       | 12*          | 23,5*   | 33       | 24*      |
| Judgment of Line Orientation Test (/30) | 25       | /            | 24      | /        | 25       |
| Clock Drawing Test (0/10)               | /        | 4,5*         | 7       | /        | /        |
| VOSP                                    |          |              |         |          |          |

|                                             |     |      |      |   |    |
|---------------------------------------------|-----|------|------|---|----|
| - Pre-test (/20)                            | 18  | /    | /    | / | 20 |
| - Incomplete Letters (20)                   | 20  | /    | /    | / | 19 |
| - Silhouettes (30)                          | 23  | /    | /    | / | 22 |
| - Object decision (/20)                     | 16  | /    | /    | / | 16 |
| - Progressive Silhouette (/20)              | 15  | /    | /    | / | 16 |
| - Dot counting (/10)                        | 5*  | /    | /    | / | 10 |
| - Position Discrimination (/20)             | 20  | /    | /    | / | 18 |
| - Number location (/10)                     | 10  | /    | /    | / | 8  |
| - Cube Analysis (/10)                       | 10  | /    | /    | / | 8  |
| <b>Language</b>                             |     |      |      |   |    |
| Phonemic Fluency                            | 55  | /    | 49   | / | 39 |
| Semantic Fluency                            | 46  | /    | 30   | / | 44 |
| WAIS IV -Similarity (/36)                   | 30  | /    | /    | / | 26 |
| Visual Naming                               |     |      |      |   |    |
| - Not Livings (/32)                         | 32  | /    | 32   | / | 32 |
| - Livings (/32)                             | 32  | /    | 32   | / | 31 |
| <b>Executive functions</b>                  |     |      |      |   |    |
| Raven CPM 47 (/36)                          | 31  | n.a. | 28   | / | 28 |
| FAB (/18)                                   | 18  | 13*  | 16   |   | 15 |
| Stroop                                      |     |      |      |   |    |
| - Time interference sec.                    | 20  | /    | 36,5 | / | 34 |
| - Error interference (/30)                  | 0   | /    | 1    | / | 3  |
| Time And Weight Estimation Task (STEP)      |     |      |      |   |    |
| - Time total (/30)                          | 23  | /    | /    | / | 21 |
| - Weight total (/30)                        | 16* | /    | /    | / | 23 |
| - Time + Weight total (/60)                 | 39* | /    | /    | / | 44 |
| - Time – Weight total (/60)                 |     | /    | /    | / | /  |
| Modified Wisconsin Card Sorting Test - MCST |     |      |      |   |    |
| - Categories (/6)                           | 4   | /    | /    | / | 6  |
| - Errors (/47)                              | 12  | /    | /    | / | 15 |
| - Perseverative errors (/47)                | 4   | /    | /    | / | 4  |

| Mental health screening                      |   |   |   |   |   |
|----------------------------------------------|---|---|---|---|---|
| Hospital Anxiety and Depression Scale - HADS |   |   |   |   |   |
| - Anxiety (/21)                              | 2 | / | / | / | 3 |
| - Depression (/21)                           | 3 | / | / | / | 2 |
| Activities of Daily Living                   |   |   |   |   |   |
| - ADL (/6)                                   | 6 | / | / | / | 6 |
| - IADL (/5)                                  | 8 | / | / | / | 5 |

**Abbreviations:** Activities of daily living (ADL); Instrumental activities of daily living (IADL); frontal assessment battery (FAB)

*Supplementary Table S4. Unilateral spatial hemineglect assessment in patient 2*

| Test                              | post edema STN-DBS       | 6 weeks later  | 4 months later |
|-----------------------------------|--------------------------|----------------|----------------|
| <b>Apples Cancellation Task</b>   |                          |                |                |
| Left Omissions (/20)              | 20                       | 1              | 0              |
| Right Omissions (/20)             | 5                        | 4              | 0              |
| Accuracy (total omissions)        | 33*                      | 8*             | 0              |
| Egocentric Asymmetry (/20)        | 15*                      | 3*             | 0              |
| Total False positives             | 4                        | 4              | 0              |
| Allocentric Asymmetry (/20)       | 2*                       | 4*             | 0              |
| Total time (sec.)                 | 300                      | 146            | 130            |
| <b>Line bisection test (/3)</b>   | 0*<br>Slight right shift | 3<br>Normality | /              |
| <b>Symbols cancellation test</b>  |                          |                |                |
| Left Omissions (/15)              | 15                       | 1              | /              |
| Rigth Omissions (/15)             | 7                        | 0              | /              |
| Central Omissions (/5)            | 5                        | 2              | /              |
| Total Omissions                   | 27*                      | 3              | /              |
| Omissions Difference (right-left) | 8*                       | 1              | /              |
| <b>Visual extinction</b>          | Absent                   | /              | /              |
| <b>Letters cancellation test</b>  |                          |                |                |

|                                   |     |   |   |
|-----------------------------------|-----|---|---|
| Left Omissions (/53)              | 53  | 0 | / |
| Rigth Omissions (/51)             | 32  | 0 | / |
| Total Omissions                   | 85* | 0 | / |
| Omissions Difference (right-left) | 21* | 0 | / |

*Supplementary Table S5. Comparison between the different neuropsychological assessments (pre-surgical intervention, post-edema, follow-up) in patient 3*

|                                       | Pre-STN-DBS | Post-STN-DBS |          |
|---------------------------------------|-------------|--------------|----------|
| Test                                  | 16 months   | 1 week       | 6 months |
| <b>Screening</b>                      |             |              |          |
| Mini-Mental State Examination (/30)   | 28          | 21*          | 29       |
| <b>Attention and Working Memory</b>   |             |              |          |
| Visual Attention Test (/50)           | 42          | 19*          | 42       |
| Trial Making Test                     |             |              |          |
| - Test A sec.                         | 49          | 264*         | 44       |
| <b>Short-term Memory</b>              |             |              |          |
| Digit Span Forward                    | 5           | 5            | 5        |
| Digit Span Backward                   | 5           | 3            | 3        |
| Corsi Block Span Forward              | 5           | 2*           | 4        |
| Corsi Block Span Backward             | 5           | 2*           | 4        |
| <b>Verbal Long-term Memory</b>        |             |              |          |
| Babcock (/28)                         | 16          | 11,5         | 15,5     |
| FCSRT (/16)                           | 9           | /            | /        |
| <b>Visuo-Spatial Long-term Memory</b> |             |              |          |
| Rey Figure – differed recall (/36)    | 16          | 14           | 19       |
| Visuo-spatial Supraspan               |             |              |          |
| - Immediate recall (/29,16)           | 21,07       | /            | /        |
| - Differed recall (/1,62)             | 1,62        | /            | /        |
| <b>Visuo-spatial Functions</b>        |             |              |          |
| Rey Figure - copy (/36)               | 33          | 24*          | 36       |
| Clock DrawingTest (/10)               |             | 0*           | 7        |
| <b>VOSP</b>                           |             |              |          |
| - Pre-test (/20)                      | 20          | /            | /        |
| - Incomplete Letters(20)              | 18          | /            | /        |
| - Silhouettes (30)                    | 23          | /            | /        |
| - Object Decision (/20)               | 14          | /            | /        |
| - Progressive Silhouette (/20)        | 12*         | /            | /        |
| - Dot counting (/10)                  | 9           | /            | /        |
| - Position Discrimination (/20)       | 20          | /            | /        |
| - Number Location (/10)               | 10          | /            | /        |
| - Cube Analysis (/10)                 | 9           | /            | /        |
| <b>Language</b>                       |             |              |          |

|                                              |      |     |    |
|----------------------------------------------|------|-----|----|
| Phonemic Fluency                             | 16   | 9*  | 19 |
| Semantic Fluency                             | 35   | 19* | 35 |
| Visual Naming                                |      |     |    |
| - Not Livings (/32)                          | 28   | /   | /  |
| - Livings (/32)                              | 31   | /   | /  |
| <b>Executive functions</b>                   |      |     |    |
| Raven CPM 47 (/36)                           | 30   | 17* | 27 |
| FAB (/18)                                    | 16   | 9*  | 15 |
| Stroop                                       |      |     |    |
| - Time interference sec.                     | 22,5 | 49* | 17 |
| - Error interference (/30)                   | 0    | 0   | 0  |
| Modified Wisconsin Card Sorting Test – MCST  |      |     |    |
| - Categories (/6)                            | 6    | 6   | /  |
| - Errors (/47)                               | 16   | 6   | /  |
| - Perseverative Errors (/47)                 | 5    | 3   | /  |
| <b>Mental health screening</b>               |      |     |    |
| Hospital Anxiety and Depression Scale – HADS |      |     |    |
| - Anxiety (/21)                              | 14*  | /   | /  |
| - Depression (/21)                           | 10*  | /   | /  |

**Abbreviations:** Activities of daily living (ADL); Instrumental activities of daily living (IADL); frontal assessment battery (FAB).

*Supplementary Table S6. Unilateral spatial hemineglect assessment in patient 3*

| Test                            | post edema STN-DBS | 6 months later |
|---------------------------------|--------------------|----------------|
| <b>Apples Cancellation Task</b> |                    |                |
| Left Omissions (/20)            | 12                 | 1              |
| Right Omissions (/20)           | 9                  | 3              |
| Accuracy (total omissions)      | 28*                | 4              |
| Egocentric Asymmetry (/20)      | 3*                 | 2              |
| Total False positives           | 0                  | 0              |
| Allocentric Asymmetry (/20)     | 0                  | 0              |
| Total time (sec.)               | 142                | 85             |
